# Supplementary material
Source: MDPI journal article supplement (https://www.mdpi.com/2075-163X/12/9/1091)
Supplement: s1 [file s1]

Archive with 2 entries (2 files):
- Supplementary Materials 1.pdf
- Supplementary Materials 2.xlsx
