# Supplementary material
Source: MDPI journal article supplement (https://www.mdpi.com/2075-163X/12/9/1091)
Supplement: s1 [file s1 › Supplementary Materials 2.xlsx]

## Sheet: Table S1
	Table S1 Whole-rock major and trace element compositions of the Xianghualing granites
	Location	431dyke	Mashibei	Tongtianmiao	Jianfengling
	Rock type	aplite	granite porphyry	granite	albite granite				biotite granite	K-feldspar granite	lepidolite granite
	Sample No.	XHL16-2	XHL17-1	XHL18-5	XHL18-8-1	XHL18-8-2	XHL18-8-3	XHL18-8-4	XHL18-9	XHL18-10	XHL18-11	Average
	SiO2 (%)	63.83	75.09	74.21	69.8	68.21	65.39	74.32	75.29	75.17	74.96	71.8771
	TiO2	<0.01	<0.01	<0.01	<0.01	<0.01	<0.01	0.01	0.01	0.02	<0.01	0.0133333
	Al2O3	18.87	14.16	14.95	17.19	18.32	17.69	13.67	13.18	13.12	14.74	15.4157
	TFe2O3	0.44	1.14	1.57	0.31	0.55	1.98	1.4	1.18	1.34	1.17	1.13286
	MnO	0.02	0.46	0.2	0.01	0.02	0.08	0.05	0.04	0.05	0.14	0.0557143
	MgO	0.02	0.22	0.06	0.13	0.13	0.12	0.08	0.02	0.04	0.05	0.0814286
	CaO	1.7	0.02	0.2	3.46	1.11	0.47	0.71	0.62	0.7	0.03	1.01429
	Na2O	4.97	0.06	3.54	3.97	6.1	3.65	3.47	3.95	3.29	3.13	3.93714
	K2O	8.39	6.35	3.19	2.03	3.91	8.63	4.6	4.27	4.71	3.97	4.58857
	P2O5	0.01	<0.01	<0.01	0.01	0.01	<0.01	<0.01	<0.01	0.01	<0.01	0.01
	LOI 1000	1.11	1.9	0.99	2.29	1.07	0.99	0.92	0.71	0.84	1.12	1.13429
	Total	99.36	99.4	98.91	99.2	99.43	99	99.23	99.27	99.29	99.31	99.2471
	Na2O + K2O	13.36	6.41	6.73	6	10.01	12.28	8.07	8.22	8	7.1	8.52571
	R1	524	3557	2963	2844	1474	1014	2653	2623	2747	2979	2333
	R2	563	298	325	737	493	412	354	331	340	300	424
	A/NK	1.09342	2.03091	1.61158	1.96944	1.28405	1.15274	1.27904	1.18524	1.24826	1.56038	1.38273
	A/CNK	0.927327	2.02037	1.55079	1.14452	1.12492	1.09193	1.1412	1.07614	1.11343	1.55142	1.17765
	Rb (ppm)	1790	2340	1490	565	1395	3260	1705	1460	1430	1845	1666
	Sr	80.5	5.9	14.5	17.5	12.1	14.8	11.3	16.6	10.3	5.3	12.6
	Ba	49.2	53.3	57.6	66.4	40.9	20.2	14.1	11.4	8.1	7.9	24.1
	Th	27.6	23.2	17.45	11.25	47.3	32.7	37.2	47.4	42.7	19.05	33.94
	U	26	13.5	16.6	5.54	9.55	9.15	7.41	18.45	34.5	10.05	13.52
	Nb	70.2	69.4	113	80.6	68.6	113.5	77.5	85.2	67.3	76.7	81.3
	Ta	35.4	23.2	129	78.6	50.1	79.1	34.2	31	29.4	46.5	49.8
	Zr	78	53	37	15	120	101	82	94	89	48	78
	Hf	6.9	6	6.1	3	11.8	7.9	6.2	7.2	6.3	5.3	6.8
	Y	114	41.4	2.4	2.1	80.9	91.8	91.9	131	132.5	28.2	79.8
	Ga	36.1	33.5	41.8	44.3	41.7	46.8	29.9	31.3	30.3	38.6	37.6
	V	<5	<5	<5	<5	6	6	7	7	8	9	7
	Cr	10	10	10	10	10	10	10	10	10	10	10
	Cs	18.1	46.1	62	13.3	33.6	70	40.3	42.3	41.8	43.9	40.7
	Sn	4	111	43	16	13	15	103	25	58	61	42
	W	10	22	13	29	28	12	29	145	43	19	44
	La	62.2	4.6	5.4	3	58.4	50.7	57.8	62.1	45.2	18	42.2
	Ce	138.5	37.1	19.7	9.9	149	113.5	121.5	138.5	103.5	45.6	97.4
	Pr	16.4	1.82	2.3	1.36	18.95	13.1	17.1	18.05	13.75	5.04	12.48
	Nd	51.6	4.5	5.5	3.2	57.8	41.8	55.9	57.3	46.9	14.9	39.7
	Sm	15.75	1.31	1.53	0.7	16.4	11.15	15.7	16.2	13.5	3.69	11.05
	Eu	0.05	0.05	0.04	0.1	0.05	0.05	0.05	0.04	0.05	<0.03	0.06
	Gd	16.05	3.83	0.72	0.4	13.6	10.95	14.95	16.5	15.1	3.87	10.77
	Tb	3.65	1.55	0.22	0.1	3.21	2.42	2.99	3.5	3.12	1.01	2.34
	Dy	25.8	12.15	1.48	0.74	22.5	16.7	18.7	24.2	22.1	7.29	16.03
	Ho	5.77	2.76	0.31	0.15	4.7	3.75	3.77	5.24	4.89	1.64	3.45
	Er	19.15	9.58	1.08	0.54	16.35	12.5	12.2	17.05	16.1	5.25	11.43
	Tm	3.39	1.89	0.26	0.13	2.98	2.28	2.28	3.04	2.83	1.08	2.09
	Yb	25	14.85	2.99	1.44	23.3	17.35	17.85	22.3	20.2	8.65	15.87
	Lu	3.64	2.18	0.46	0.24	3.52	2.66	2.7	3.29	3.01	1.26	2.38
	ΣREE	387	98.2	42	22	390.8	298.9	343.5	387.3	310.3	117.3	267.1
	LREE	284.5	49.4	34.5	18.3	300.6	230.3	268.1	292.2	222.9	87.2	202.8
	HREE	102.5	48.8	7.5	3.7	90.2	68.6	75.4	95.1	87.4	30.1	64.4
	LREE/HREE	2.78	1.01	4.58	4.88	3.33	3.36	3.55	3.07	2.55	2.9	3.38
	Ce/Ce*	1	3	1.31	1.14	1.05	1.01	0.9	0.96	0.97	1.11	1.02
	Eu/Eu*	<0.1	0.063	0.102	0.53	<0.1	<0.1	<0.1	<0.1	<0.1	<0.1	0.087
	K/Rb	38.9	22.5	17.8	29.8	23.3	22	22.4	24.3	27.3	17.9	23.8
	Rb/Sr	22.2	396.6	102.8	32.3	115.3	220.3	150.9	88	138.8	348.1	156.2
	Y/Ho	19.8	15	7.7	14	17.2	24.5	24.4	25	27.1	17.2	21.3
	Zr/Hf	11.3	8.8	6.1	5	10.2	12.8	13.2	13.1	14.1	9.1	11.1
	Nb/Ta	2	3	0.9	1	1.4	1.4	2.3	2.7	2.3	1.6	1.8
	La/Nb	0.9	0.1	<0.1	<0.1	0.9	0.4	0.7	0.7	0.7	0.2	0.5
	Th/U	1.1	1.7	1.1	2	5	3.6	5	2.6	1.2	1.9	3

## Sheet: Table S2
	Table S2 Zircon LA-ICPMS U–Pb isotopic compositions of the Xianghualing granites
	Analytical spot	207Pb/206Pb	1σ	207Pb/235U	1σ	206Pb/238U	1σ	207Pb/206Pb	1σ	207Pb/235U	1σ	206Pb/238U	1σ
	Sample XHL17-1, granite porphyry
	XHL17-1-01	0.0433	0.0051	0.0918	0.0104	0.0146	0.0002	-	-	89.2	9.7	93.6	1.3
	XHL17-1-02	0.0457	0.0025	0.1115	0.0057	0.0177	0.0002	-	-	107.3	5.2	113.3	1.2
	XHL17-1-03	0.0509	0.0014	0.1743	0.0059	0.0245	0.0004	239	64.8	163.2	5.1	155.8	2.5
	XHL17-1-04	0.0474	0.0014	0.1218	0.0041	0.0184	0.0003	77.9	122.2	116.7	3.8	117.5	2.1
	XHL17-1-05	0.047	0.0018	0.1672	0.006	0.0259	0.0003	55.7	144.4	157	5.2	164.7	1.6
	XHL17-1-06	0.0504	0.0012	0.2295	0.0105	0.0329	0.0013	213	83.3	209.8	8.7	208.8	8.2
	XHL17-1-07	0.0537	0.0014	0.196	0.0052	0.0264	0.0003	366.7	57.4	181.7	4.4	168	1.6
	XHL17-1-08	0.0485	0.0013	0.1797	0.0051	0.0269	0.0004	124.2	64.8	167.8	4.4	171.2	2.2
	XHL17-1-09	0.0514	0.0024	0.1721	0.008	0.0245	0.0004	257.5	107.4	161.2	7	155.8	2.3
	XHL17-1-10	0.0538	0.0013	0.4164	0.0115	0.0559	0.0009	361.2	51.8	353.5	8.3	350.6	5.8
	XHL17-1-11	0.0495	0.0029	0.0873	0.0052	0.0126	0.0001	172.3	137	85	4.8	80.6	0.7
	XHL17-1-12	0.05	0.0029	0.115	0.0068	0.0164	0.0002	194.5	135.2	110.5	6.2	104.6	1
	XHL17-1-13	0.0496	0.0017	0.1844	0.006	0.0268	0.0003	176	79.6	171.8	5.2	170.7	1.7
	XHL17-1-14	0.0498	0.0023	0.1839	0.0083	0.0267	0.0003	183.4	107.4	171.4	7.1	170	2.1
	XHL17-1-15	0.0477	0.0015	0.1411	0.0042	0.0214	0.0003	87.1	78.7	134	3.7	136.5	1.9
	XHL17-1-16	0.0493	0.0017	0.1173	0.0045	0.0174	0.0005	161.2	79.6	112.6	4.1	111.2	2.9
	XHL17-1-17	0.0467	0.0018	0.1136	0.0042	0.0175	0.0001	35.3	88.9	109.2	3.9	112.1	0.9
	XHL17-1-18	0.0504	0.002	0.0788	0.0033	0.0112	0.0001	213	92.6	77	3.1	71.6	0.6
	XHL17-1-19	0.0488	0.0013	0.0842	0.0022	0.0125	0.0001	200.1	61.1	82.1	2	79.8	0.8
	XHL17-1-20	0.05	0.0018	0.1575	0.0058	0.0228	0.0003	194.5	85.2	148.5	5.1	145.2	1.7
	XHL17-1-21	0.0461	0.0015	0.1132	0.0037	0.0177	0.0002	400.1	-320.3	108.8	3.4	113	1.3
	XHL17-1-22	0.0484	0.0014	0.1248	0.0037	0.0186	0.0002	116.8	63.9	119.5	3.3	118.9	1.2
	XHL17-1-23	0.0476	0.0022	0.1499	0.0074	0.0225	0.0002	79.7	107.4	141.8	6.6	143.4	1.5
	XHL17-1-24	0.0487	0.0013	0.0901	0.0024	0.0134	0.0002	200.1	60.2	87.6	2.2	85.7	1
	XHL17-1-25	0.049	0.0013	0.1648	0.0048	0.0241	0.0003	146.4	63	154.9	4.2	153.2	1.7
	XHL17-1-26	0.0467	0.002	0.0921	0.0035	0.0144	0.0002	35.3	96.3	89.5	3.3	92	1.2
	XHL17-1-27	0.0471	0.0025	0.1596	0.0084	0.0243	0.0003	53.8	122.2	150.4	7.3	154.9	1.7
	XHL17-1-28	0.0437	0.0019	0.0731	0.0031	0.012	0.0001	-	-	71.6	3	76.7	0.8
	XHL17-1-29	0.0435	0.0017	0.101	0.0039	0.0166	0.0002	-	-	97.7	3.6	106.4	1.5
	XHL17-1-30	0.0466	0.0013	0.0514	0.0014	0.0079	0.0001	27.9	66.7	50.9	1.4	50.7	0.6
	Sample XHL18-5, granite
	XHL18-5-01	0.0443	0.0013	0.1145	0.0033	0.0186	0.0002	-	-	110.1	3	118.6	1.1
	XHL18-5-02	0.0481	0.0019	0.1139	0.0043	0.017	0.0001	105.6	92.6	109.5	3.9	108.5	0.9
	XHL18-5-03	0.0467	0.0018	0.1255	0.0046	0.0195	0.0003	35.3	88.9	120	4.1	124.2	1.6
	XHL18-5-04	0.0492	0.0029	0.1448	0.0086	0.0212	0.0004	153.8	138.9	137.3	7.7	135.3	2.4
	XHL18-5-05	0.0493	0.0036	0.1328	0.0088	0.0197	0.0004	161.2	162.9	126.6	7.9	125.9	2.3
	XHL18-5-06	0.0495	0.0034	0.1393	0.0085	0.0207	0.0003	172.3	-39.8	132.4	7.6	132.3	2.2
	XHL18-5-07	0.0492	0.006	0.1267	0.0156	0.0187	0.0003	166.8	266.6	121.1	14.1	119.5	1.9
	XHL18-5-08	0.0553	0.0036	0.4635	0.0306	0.061	0.0008	433.4	144.4	386.7	21.2	381.5	4.9
	XHL18-5-09	0.052	0.0036	0.1482	0.0096	0.0208	0.0003	287.1	161.1	140.3	8.5	132.9	2
	XHL18-5-10	0.0508	0.002	0.2885	0.0112	0.0409	0.0005	231.6	60.2	257.4	8.8	258.4	3.3
	XHL18-5-11	0.0521	0.0031	0.1422	0.008	0.0198	0.0003	287.1	137	135	7.2	126.4	2
	XHL18-5-12	0.0525	0.0034	0.1344	0.0081	0.0186	0.0003	309.3	148.1	128.1	7.2	118.7	1.8
	XHL18-5-13	0.0592	0.0028	0.6873	0.0307	0.0836	0.0012	572.3	97.2	531.2	18.5	517.4	6.9
	XHL18-5-14	0.0513	0.0019	0.2278	0.0081	0.0319	0.0004	253.8	88	208.4	6.7	202.5	2.3
	XHL18-5-15	0.0517	0.003	0.1378	0.0078	0.0192	0.0003	272.3	167.6	131	7	122.9	1.7
	XHL18-5-16	0.0494	0.0027	0.1381	0.0074	0.0201	0.0003	168.6	132.4	131.4	6.6	128.3	1.8
	XHL18-5-17	0.0535	0.0024	0.3086	0.0134	0.0417	0.0007	350.1	106.5	273.1	10.4	263.5	4.3
	XHL18-5-18	0.0506	0.0028	0.1332	0.007	0.0192	0.0003	220.4	127.8	127	6.3	122.7	1.9
	XHL18-5-19	0.0515	0.0026	0.1373	0.0068	0.0193	0.0003	261.2	118.5	130.7	6.1	123.3	1.7
	XHL18-5-20	0.0473	0.0043	0.123	0.0099	0.0192	0.0004	64.9	268.5	117.8	8.9	122.5	2.3
	XHL18-5-21	0.0486	0.003	0.1284	0.0076	0.0193	0.0004	127.9	137	122.7	6.8	122.9	2.2
	XHL18-5-22	0.0486	0.0029	0.1274	0.0074	0.0191	0.0003	131.6	133.3	121.8	6.7	121.7	1.9
	XHL18-5-23	0.0473	0.0029	0.1294	0.0077	0.0198	0.0004	61.2	150	123.5	7	126.4	2.3
	XHL18-5-24	0.0492	0.0033	0.1302	0.0082	0.0192	0.0003	166.8	142.6	124.2	7.3	122.7	2
	XHL18-5-25	0.0511	0.0047	0.3371	0.0237	0.0497	0.0012	255.6	211.1	295	18	312.7	7.2
	XHL18-5-26	0.0499	0.0037	0.129	0.0083	0.0188	0.0003	190.8	172.2	123.2	7.5	119.8	2.1
	XHL18-5-27	0.0504	0.0032	0.1297	0.0078	0.0187	0.0003	213	146.3	123.8	7	119.5	1.8
	XHL18-5-28	0.0483	0.0031	0.1269	0.007	0.0192	0.0003	122.3	131.5	121.3	6.3	122.8	1.9
	XHL18-5-29	0.0472	0.0025	0.1219	0.0064	0.0187	0.0003	57.5	131.5	116.8	5.8	119.6	1.7
	Sample XHL18-9, biotite granite
	XHL18-9-01	0.0364	0.0105	0.0953	0.0223	0.0153	0.0002	-	-	92.4	20.7	97.7	1.4
	XHL18-9-02	0.047	0.0028	0.0821	0.0043	0.0129	0.0002	50.1	137	80.1	4	82.8	1.4
	XHL18-9-03	0.0482	0.0036	0.1224	0.009	0.0183	0.0002	109.4	166.6	117.2	8.2	116.7	1
	XHL18-9-04	0.0321	0.0098	0.1	0.0257	0.0165	0.0003	-	-	96.8	23.7	105.6	2
	XHL18-9-05	0.0322	0.0118	0.095	0.0241	0.014	0.0003	-	-	92.1	22.3	89.9	1.7
	XHL18-9-06	0.0464	0.0037	0.0763	0.0059	0.0119	0.0002	16.8	181.5	74.6	5.6	76.2	1.1
	XHL18-9-07	0.0052	0.0248	0.0876	0.0313	0.0137	0.0003	-	-	85.3	29.2	87.5	1.9
	XHL18-9-08	0.0463	0.005	0.1398	0.0149	0.0208	0.0002	13.1	240.7	132.9	13.3	132.6	1.5
	XHL18-9-09	0	0	0.1096	0.0888	0.0154	0.0008	-	-	105.6	81.3	98.8	4.8
	XHL18-9-10	0	0	0.1259	0.1494	0.0188	0.0014	-	-	120.4	134.7	120	8.6
	XHL18-9-11	0.0387	0.0102	0.0662	0.0142	0.01	0.0001	-	-	65.1	13.5	63.9	0.9
	XHL18-9-12	0.0276	0.0126	0.1092	0.03	0.0163	0.0004	-	-	105.3	27.5	104.5	2.4
	XHL18-9-13	0.0457	0.0035	0.1018	0.0076	0.0161	0.0001	-	-	98.4	7	102.8	0.9
	XHL18-9-14	0.0406	0.0081	0.0831	0.0147	0.0129	0.0002	-	-	81	13.7	82.9	1.3
	XHL18-9-15	0.0493	0.0047	0.1017	0.0097	0.0151	0.0002	166.8	201.8	98.4	8.9	96.4	1.1
	XHL18-9-16	0.035	0.0103	0.1217	0.0269	0.0186	0.0004	-	-	116.6	24.4	118.8	2.3
	XHL18-9-17	0.0309	0.0139	0.0703	0.0226	0.0111	0.0002	-	-	68.9	21.5	71.2	1.3
	XHL18-9-18	0.0477	0.0059	0.1346	0.017	0.0199	0.0003	83.4	270.3	128.2	15.2	127.2	1.6
	XHL18-9-19	0.0488	0.003	0.113	0.0075	0.0156	0.0003	139	137	108.7	6.8	99.8	1.8
	XHL18-9-20	0.0479	0.0053	0.1316	0.0146	0.0199	0.0002	100.1	244.4	125.5	13.1	127.2	1.3
	XHL18-9-21	0.0405	0.0071	0.0695	0.0121	0.0109	0.0001	-	-	68.2	11.5	70.1	0.9
	XHL18-9-22	0.0466	0.0064	0.1314	0.0172	0.0198	0.0002	27.9	300	125.4	15.4	126.6	1.4
	XHL18-9-23	0.0505	0.0031	0.0665	0.0041	0.0093	0.0001	220.4	144.4	65.4	3.9	60	0.5
	XHL18-9-24	0.0469	0.002	0.0978	0.0047	0.0145	0.0002	42.7	100	94.8	4.4	92.9	1.2
	XHL18-9-25	0.0446	0.0065	0.0988	0.0142	0.015	0.0002	-	-	95.6	13.1	95.8	1.1
	XHL18-9-26	0.0502	0.0018	0.0692	0.0023	0.0098	0.0001	205.6	81.5	67.9	2.2	62.9	0.6
	XHL18-9-27	0.0465	0.0028	0.0924	0.0054	0.0142	0.0002	33.4	127.8	89.7	5	91.1	1
	XHL18-9-28	0.0294	0.0118	0.0645	0.0214	0.0106	0.0002	-	-	63.5	20.4	67.9	1.5
	XHL18-9-29	0.0399	0.0083	0.0826	0.0163	0.0127	0.0002	-	-	80.6	15.2	81.2	1.4
	XHL18-9-30	0.0352	0.0204	0.0554	0.0229	0.008	0.0001	-	-	54.7	22	51.6	0.8
	XHL18-9-31	0.0501	0.0024	0.1162	0.0065	0.0164	0.0003	211.2	112.9	111.6	6	104.7	2

## Sheet: Table S3
	Table S3 Zircon LA-ICPMS trace element compositions of the Xianghualing granites
	Analytical spot	P (ppm)	Ti	Y	Nb	Hf	Ta	Pb	Th	U	La	Ce	Pr	Nd	Sm	Eu	Gd	Tb	Dy	Ho	Er	Tm	Yb	Lu	ΣREE	LREE	HREE	LREE/HREE	Eu/Eu*	Ce/Ce*	Y/Ho	Th/U	Nb/Ta	Hf/Y
	Sample XHL17-1, granite porphyry
	XHL17-1-01	3936	33.7	10984	1084	20461	238	1540	6991	17631	47.7	199	31.8	137	131	0.24	307	141	1649	489	2176	531	5503	814	12157	547	11610	0.05	0.004	1.15	22.4	0.4	4.5	1.9
	XHL17-1-02	2271	44.4	8898	742	20612	271	635	3131	16059	6.83	75.8	6.63	37.9	56.4	0.06	202	95.6	1194	389	1768	433	4403	670	9339	184	9156	0.02	0.002	2.37	22.9	0.19	2.7	2.3
	XHL17-1-03	1149	2.97	7014	98.5	13127	45	472	3101	12128	1.65	42.4	2.03	12.8	21.8	0.12	124	52.7	693	250	1122	251	2459	348	5379	81	5299	0.02	0.005	4.59	28.1	0.26	2.2	1.9
	XHL17-1-04	4983	30	15614	284	13706	144	495	4247	12612	8.13	90.5	13.8	121	197	0.18	620	221	2281	634	2556	543	4976	687	12948	431	12517	0.03	0.001	1.54	24.6	0.34	2	0.9
	XHL17-1-05	464	8.3	3019	19.4	11664	8.21	229	1555	3872	1.33	33.9	2.9	17.6	15.5	0.16	68.2	23.7	287	103	457	99.6	943	149	2202	71	2130	0.03	0.013	2.86	29.4	0.4	2.4	3.9
	XHL17-1-06	2325	28	4817	133	21333	140	1288	11546	19750	219	591	88.2	425	111	0.15	153	43.4	502	189	902	222	2259	371	6073	1434	4639	0.31	0.004	1	25.6	0.58	1	4.4
	XHL17-1-07	4562	30.8	18737	326	14201	152	3486	19931	44803	44.3	224	25.9	160	129	0.17	452	159	1922	677	2973	646	6114	879	14406	583	13823	0.04	0.002	1.52	27.7	0.44	2.1	0.8
	XHL17-1-08	1481	8.03	5673	177	18646	151	338	1356	11632	2.09	35.8	1.07	7.37	13	0.012	78.4	38.1	541	205	990	237	2421	367	4937	59	4878	0.01	0.001	5.53	27.7	0.12	1.2	3.3
	XHL17-1-09	1994	16.2	4883	88.3	11912	20.1	359	2390	4691	27	107	10.7	61.9	35	0.2	124	42.9	511	173	731	155	1485	216	3680	241	3438	0.07	0.008	1.47	28.3	0.51	4.4	2.4
	XHL17-1-10	1140	6.56	5975	58.2	12618	31.4	4471	4949	8790	4.56	73.8	5.49	42.3	44.8	0.31	163	57.6	663	224	983	217	2078	295	4851	171	4679	0.04	0.01	2.94	26.6	0.56	1.9	2.1
	XHL17-1-11	4118	157	16578	996	13747	220	1386	12174	26184	47.3	252	36.3	173	196	0.46	509	219	2335	664	2834	667	6650	932	15514	705	14809	0.05	0.004	1.34	25	0.46	4.5	0.8
	XHL17-1-12	3117	8.05	9504	390	21890	313	801	6833	15036	82.5	248	32.4	129	124	0.21	336	155	1713	494	2179	552	5769	886	12700	617	12083	0.05	0.003	1.12	19.2	0.45	1.2	2.3
	XHL17-1-13	858	10.4	4302	132	16588	60.8	449	1930	8775	6.13	52.4	5.16	24.7	23	0.014	90.7	42.5	551	190	905	222	2333	343	4788	111	4677	0.02	0.001	2.01	22.6	0.22	2.2	3.9
	XHL17-1-14	1261	23.1	4950	151	13269	52.4	368	1996	7227	189	577	75.1	361	151	0.061	266	77.4	750	210	846	186	1711	244	5644	1353	4291	0.32	0.001	1.13	23.5	0.28	2.9	2.7
	XHL17-1-15	2083	5.39	9213	231	17051	134	436	2196	14482	8.86	64.8	3.45	21.7	30.9	0.065	141	62.7	858	320	1513	355	3504	530	7412	130	7282	0.02	0.003	2.75	28.8	0.15	1.7	1.9
	XHL17-1-16	5245	15.8	16047	307	16391	181	513	5798	17220	42.2	189	26	127	174	0.44	545	221	2282	653	2728	622	5970	851	14432	559	13873	0.04	0.004	1.29	24.6	0.34	1.7	1
	XHL17-1-17	1336	13.7	6966	267	13495	134	413	2980	10748	7.19	69.4	6.59	28.9	39.8	0.1	146	67.3	817	272	1205	279	2778	412	6128	152	5976	0.03	0.004	2.14	25.6	0.28	2	1.9
	XHL17-1-18	4652	128	19157	2150	17813	325	906	9569	20324	66.7	411	58.1	234	246	0.72	566	275	3104	874	3708	881	8911	1188	20524	1017	19507	0.05	0.006	1.42	21.9	0.47	6.6	0.9
	XHL17-1-19	6752	27.4	21155	427	14621	215	1024	16406	36121	165	549	78.8	393	321	0.31	790	286	2883	859	3551	762	7243	1030	18911	1507	17404	0.09	0.002	1.12	24.6	0.45	2	0.7
	XHL17-1-20	904	8.42	3487	305	18065	119	402	1480	5808	5.4	30.9	4.66	20.3	22.9	0.062	71.6	39.9	517	163	763	190	2045	297	4171	84	4087	0.02	0.004	1.33	21.4	0.25	2.6	5.2
	XHL17-1-21	2081	7.88	8429	477	19620	256	486	4007	12928	10.4	80.8	9.45	44.7	65.1	0.092	211	106	1238	376	1706	425	4531	644	9447	210	9237	0.02	0.002	1.74	22.4	0.31	1.9	2.3
	XHL17-1-22	1272	186	12379	143	10871	40.8	1007	11244	17478	154	450	32.3	139	77.1	0.33	324	119	1342	430	1788	371	3368	471	9066	853	8213	0.1	0.005	1.43	28.8	0.64	3.5	0.9
	XHL17-1-23	530	5.76	2707	40.8	12385	13.1	287	1244	3442	5.7	48.5	3.72	19.6	18.6	0.075	69	26.5	309	101	427	95	910	129	2163	96	2067	0.05	0.006	2.37	26.7	0.36	3.1	4.6
	XHL17-1-24	3492	12.3	14122	398	19634	323	891	8431	36681	25.4	166	13.1	65.9	71.1	0.088	300	135	1714	613	2885	694	7017	1064	14765	341	14424	0.02	0.002	2.1	23	0.23	1.2	1.4
	XHL17-1-25	938	4.96	5549	198	13415	81.6	534	2563	11052	2.96	57.3	3.34	16.4	25.2	0.073	99.2	46.9	605	209	927	205	1995	307	4500	105	4394	0.02	0.004	3.69	26.6	0.23	2.4	2.4
	XHL17-1-26	2504	20.8	11731	535	14837	272	717	5421	16817	18.8	153	19.9	82.4	108	0.4	315	151	1669	487	2154	515	5221	762	11657	383	11274	0.03	0.006	1.63	24.1	0.32	2	1.3
	XHL17-1-27	1112	53.4	5852	395	11919	94.8	829	4366	10397	4.97	75.5	5.39	24.9	35.1	0.091	135	66.7	784	244	1042	238	2362	349	5366	146	5220	0.03	0.004	2.98	24	0.42	4.2	2
	XHL17-1-28	3406	42.6	17019	305	13742	175	686	13339	18440	20.5	229	23.1	108	178	0.69	553	229	2408	672	2776	617	5983	819	14614	560	14055	0.04	0.006	2.13	25.3	0.72	1.7	0.8
	XHL17-1-29	1836	8.67	5884	308	29434	328	635	14114	21100	6.96	90.8	7.73	48.4	61.2	0.051	183	85.7	1130	403	2087	580	6575	1091	12349	215	12134	0.02	0.001	2.52	14.6	0.67	0.9	5
	XHL17-1-30	4944	7.59	21841	184	14400	84.9	414	7487	34242	30.3	353	38.9	161	199	1.17	535	211	2315	737	3174	669	6275	937	15636	784	14853	0.05	0.01	2.01	29.6	0.22	2.2	0.7
	Sample XHL18-5, granite
	XHL18-5-01	2265	21.3	1019	240	122422	1121	579	8995	8129	3.08	57.7	12.9	61.7	94.3	0.74	140	75.5	882	229	1226	485	6933	1032	11233	230	11003	0.02	0.02	1.18	4.5	1.11	0.2	120.2
	XHL18-5-02	2648	31.8	1571	360	122810	1413	992	13958	10082	4.98	79.9	18.3	87	171	2.27	257	129	1324	310	1517	561	7793	1088	13344	363	12981	0.03	0.033	1.13	5.1	1.38	0.3	78.2
	XHL18-5-03	2254	18.3	1115	320	117493	1351	858	12465	8938	1.42	35.6	8.02	50.9	93	0.84	167	88.3	1009	260	1353	527	7545	1095	12233	190	12043	0.02	0.02	1.19	4.3	1.39	0.2	105.4
	XHL18-5-04	260	3.45	739	1.76	12159	0.29	21.7	181	642	-	18.2	0.017	0.45	1.55	1.17	13.6	4.27	48.2	19.2	92.4	22.4	251	50.6	523	21	502	0.04	0.529	302.34	38.4	0.28	6	16.5
	XHL18-5-05	218	1.94	433	0.85	12399	0.25	12.2	104	408	0.012	11.4	0.057	0.57	1.35	0.74	8.97	2.35	29.5	11.4	57.6	14.2	157	34.1	330	14	316	0.04	0.483	53.05	38	0.25	3.4	28.6
	XHL18-5-06	218	1.38	543	0.97	11809	0.18	19.1	170	544	-	15.5	-	0.45	1.67	0.87	9.93	2.87	33.6	14.1	67.8	16.6	193	40	396	18	378	0.05	0.507	-	38.5	0.31	5.5	21.8
	XHL18-5-07	152	4.66	486	1.65	13681	0.3	96	278	870	0.074	18.5	0.0097	0.9	1.94	0.95	9.77	2.82	30.4	13.2	60.1	13.3	150	31.3	334	22	311	0.07	0.54	141.12	36.8	0.32	5.4	28.1
	XHL18-5-08	547	17.9	2063	4.6	8243	0.73	310	1357	872	0.49	84.9	0.78	8.81	14.6	3.69	60.1	18.2	194	67.2	287	56.1	511	87.7	1395	113	1282	0.09	0.327	25.14	30.7	1.56	6.3	4
	XHL18-5-09	200	3.47	439	1.86	11891	0.31	21.2	196	619	0.053	17	0.043	0.35	1.16	0.84	7.73	2.57	29	11.4	56	13.1	148	30.8	318	19	299	0.07	0.634	77.08	38.6	0.32	6	27.1
	XHL18-5-10	335	1.26	1071	3.05	11855	1.84	79.8	406	1167	-	8.52	0.1	1.38	3.47	0.11	21	8.3	94.6	34.9	160	34.1	320	54.2	741	14	728	0.02	0.03	23.82	30.6	0.35	1.7	11.1
	XHL18-5-11	222	1.72	710	2.14	12111	0.32	28.8	280	799	-	23	0.031	0.64	2.15	1.37	14.7	3.69	46.2	18.8	90.2	21.2	244	48.4	514	27	487	0.06	0.547	209.28	37.8	0.35	6.6	17
	XHL18-5-12	265	5.87	686	1.98	12069	0.33	27.6	314	745	0.012	25.8	0.098	0.66	2.61	2.19	14.6	4.48	52.4	19.4	90.2	19.6	221	41.9	495	31	464	0.07	0.853	72.07	35.4	0.42	6.1	17.6
	XHL18-5-13	669	1.15	847	1.23	10995	0.42	67.6	183	316	1.09	21.5	0.44	2.5	3.79	1.12	20.6	6.38	73.3	26.6	120	26.8	270	49.8	624	30	593	0.05	0.307	7.26	31.8	0.58	2.9	13
	XHL18-5-14	997	4.88	2376	8.99	12788	3.71	87	585	1353	13.2	43.9	5.45	29.1	12.8	0.19	48	16.5	212	77.9	351	75	711	118	1712	105	1608	0.07	0.02	1.21	30.5	0.43	2.4	5.4
	XHL18-5-15	449	5.7	835	2.4	11236	0.38	40.7	457	859	0.98	34.4	0.37	3.27	3.97	2.2	20.3	5.83	61.9	22.6	104	23.9	248	48.9	580	45	535	0.08	0.606	13.34	36.9	0.53	6.3	13.5
	XHL18-5-16	250	2.11	1047	5.59	11818	0.95	77	949	1424	0.52	39	0.42	3.76	5.75	2.23	24.2	6.96	77.1	28.3	137	32	326	60.8	744	52	692	0.07	0.493	18.27	37	0.67	5.9	11.3
	XHL18-5-17	418	5.69	1425	4.35	11190	2.09	72	391	907	0.06	7.6	0.095	2.3	4.16	0.3	27.9	10.3	122	47.1	217	44.7	434	71.2	988	15	974	0.01	0.063	18.56	30.3	0.43	2.1	7.9
	XHL18-5-18	247	1.92	614	2.09	12364	0.33	31.4	345	925	0.073	24.3	0.048	0.7	1.33	1.34	13.7	3.84	44.8	16.2	76.1	18.4	206	41.4	448	28	420	0.07	0.611	92.44	37.9	0.37	6.4	20.1
	XHL18-5-19	217	3.77	646	2.34	12608	0.31	25.6	252	799	-	20.6	0.055	0.68	2.3	1.36	12.5	3.76	44.6	17.7	85.3	20.2	224	44.5	477	25	452	0.06	0.616	107.72	36.5	0.32	7.4	19.5
	XHL18-5-20	229	3.31	591	1.19	12520	0.26	12.2	101	421	0.051	13	0.015	1.01	1.6	1.08	11.7	3.34	38.4	15.3	77.7	18.1	216	44.2	442	17	425	0.04	0.552	108.35	38.6	0.24	4.6	21.2
	XHL18-5-21	222	4.11	869	2.54	11983	0.37	32.6	424	848	-	33.8	0.043	1.65	3.82	2.01	20	5.78	63.8	23.3	114	26.3	284	55.8	634	41	593	0.07	0.565	226.42	37.3	0.5	6.8	13.8
	XHL18-5-22	206	1.28	545	1.91	12402	0.34	24.9	264	767	-	23.6	0.04	0.47	1.92	1.22	10.7	3.18	36.9	14.1	70.2	16.9	187	37	403	27	376	0.07	0.649	169.41	38.6	0.34	5.6	22.8
	XHL18-5-23	271	2833	1154	12.3	11501	1.17	32.1	357	769	19.7	120	13.5	74.6	23.1	7.11	41.8	11.1	104	34.2	146	31.8	314	56.8	998	258	740	0.35	0.691	1.64	33.8	0.46	10.6	10
	XHL18-5-24	185	2.51	653	1.5	12686	0.27	12.4	95.9	502	0.036	14.1	0.031	0.73	1.41	1.18	9.75	3.7	41	16.6	85.1	21	243	49	487	17	469	0.04	0.717	90.36	39.3	0.19	5.6	19.4
	XHL18-5-25	748	1.33	1733	1.87	10598	0.54	12.8	58.8	114	0.013	13.3	0.11	1.26	3.92	0.91	26.3	10.1	133	54.1	269	61.9	652	121	1348	19	1328	0.01	0.204	33.81	32	0.52	3.5	6.1
	XHL18-5-26	279	8.68	893	2.14	10602	0.35	14.2	145	387	-	29.5	0.12	1.43	4.43	2.31	24.7	6.97	78.1	26.6	115	24.6	244	45.2	603	38	565	0.07	0.531	71.21	33.6	0.38	6.1	11.9
	XHL18-5-27	235	2.35	652	2.29	12207	0.47	25.8	278	772	0.012	22.7	-	0.69	2.01	1.15	14	4.14	48.1	17.2	87.4	19.3	217	42.7	476	27	450	0.06	0.484	1438	37.9	0.36	4.9	18.7
	XHL18-5-28	585	4.36	611	2.19	12403	0.23	19.7	172	582	0.38	18.2	0.19	1.32	1.87	1.44	11.4	3.72	42.4	16.1	80.2	19.7	223	44.4	465	23	441	0.05	0.729	15.91	37.9	0.3	9.5	20.3
	XHL18-5-29	257	1.04	643	2.39	12675	0.42	28.8	309	885	0.012	22.1	0.023	0.82	2.39	1.24	12.8	3.79	45.9	16.9	81.7	19.1	214	41.4	462	27	436	0.06	0.548	227.35	38.2	0.35	5.7	19.7
	Sample XHL18-9, biotite granite
	XHL18-9-01	10459	106	40085	1480	47708	611	6131	6207	37276	23.4	161	24.6	145	291	0.47	1202	737	8524	2392	9238	2279	20037	2952	48004	645	47360	0.01	0.002	1.38	16.8	0.17	2.4	1.2
	XHL18-9-02	25678	244	84898	2306	53415	866	2073	22785	64996	35.2	339	61	416	919	1.85	4134	2264	23085	6049	21137	4814	41464	6040	110759	1772	108988	0.02	0.002	1.31	14	0.35	2.7	0.6
	XHL18-9-03	5426	92.6	18029	1076	38307	289	2006	5559	23691	16.7	128	17.2	107	138	0.058	493	279	3356	1005	4002	971	8567	1272	20351	406	19945	0.02	0.001	1.56	17.9	0.23	3.7	2.1
	XHL18-9-04	12739	222	33190	1430	56180	656	2588	4428	35359	26.6	150	26.7	162	376	0.66	1430	825	9004	2434	9094	2257	20760	3239	49786	742	49044	0.02	0.002	1.17	13.6	0.13	2.2	1.7
	XHL18-9-05	31050	173	86852	2195	56988	1077	6419	18050	51880	49.9	362	61.9	376	933	1.7	5205	2969	27794	6748	21778	4522	36352	5408	112559	1784	110775	0.02	0.002	1.29	12.9	0.35	2	0.7
	XHL18-9-06	29565	247	95849	2319	32938	693	3562	23299	58323	47.3	425	72.7	473	987	1.83	4444	2451	25285	6547	22735	5130	43681	6344	118624	2007	116617	0.02	0.002	1.35	14.6	0.4	3.3	0.3
	XHL18-9-07	12309	322	56548	2975	30481	344	9986	25651	39521	81.4	424	73.7	387	541	1.56	1709	1010	11547	3194	11727	2740	23363	3282	60078	1508	58570	0.03	0.005	1.17	17.7	0.65	8.7	0.5
	XHL18-9-08	6432	54.2	16577	855	36655	315	3559	4107	26064	274	932	114	432	234	0.44	576	291	3230	989	4062	1043	9402	1542	23121	1986	21135	0.09	0.004	1.24	16.8	0.16	2.7	2.2
	XHL18-9-09	17591	337	52462	2425	48768	675	11460	50026	34673	18912	43269	5272	20368	6020	4.22	5679	1585	14246	3578	12918	2953	25136	3712	163653	93845	69807	1.34	0.002	1	14.7	1.44	3.6	0.9
	XHL18-9-10	8876	116	25803	1247	42088	503	23609	7133	60275	36.2	247	38.2	221	270	0.63	900	499	5706	1642	6683	1698	15754	2503	36199	813	35386	0.02	0.004	1.37	15.7	0.12	2.5	1.6
	XHL18-9-11	39502	409	122257	4341	54770	1322	6395	20547	75126	81	636	110	669	1384	2.74	5906	3152	32150	8509	31067	7327	65354	9653	166001	2883	163118	0.02	0.002	1.29	14.4	0.27	3.3	0.4
	XHL18-9-12	21561	111	53598	1616	47688	786	5809	21906	32366	166	554	87.6	435	698	2.22	2937	1559	15596	4001	14531	3386	29576	4449	77976	1942	76034	0.03	0.004	1.06	13.4	0.68	2.1	0.9
	XHL18-9-13	8897	88.5	39948	1314	26908	217	2648	20776	34864	13.9	259	23.8	165	316	1.07	1171	698	8098	2271	8235	1863	15678	2210	41005	779	40225	0.02	0.005	2.56	17.6	0.6	6.1	0.7
	XHL18-9-14	14980	115	43062	1384	32844	460	7852	82912	48232	549	1450	203	977	838	0.9	2436	1094	10432	2683	9698	2243	19054	2838	54496	4018	50478	0.08	0.002	1.02	16.1	1.72	3	0.8
	XHL18-9-15	16327	181	58074	1899	33348	301	2854	14539	38254	26.1	273	37.4	234	533	1.23	2223	1226	13292	3689	13281	3133	26577	3858	68384	1105	67278	0.02	0.003	1.66	15.7	0.38	6.3	0.6
	XHL18-9-16	6918	172	23222	1092	42572	353	3428	5798	25039	23.5	154	23.6	130	234	0.69	918	513	5313	1463	5555	1324	11306	1730	28686	565	28121	0.02	0.004	1.36	15.9	0.23	3.1	1.8
	XHL18-9-17	54721	360	144895	2870	39314	971	6381	42029	88609	12667	31438	3902	15307	6305	6.55	15557	6573	55233	11998	34621	6614	49990	6727	256939	69625	187314	0.37	0.002	1.04	12.1	0.47	3	0.3
	XHL18-9-18	4306	98.9	20605	853	32570	231	1850	6396	22454	15.7	164	19.8	120	181	0.47	570	308	3558	1049	3999	919	7607	1148	19660	502	19159	0.03	0.004	1.84	19.7	0.28	3.7	1.6
	XHL18-9-19	5293	51.1	15752	746	41372	285	1264	7963	30193	165	457	58.5	258	198	0.38	606	288	3060	874	3388	832	7497	1216	18897	1136	17761	0.06	0.003	1.09	18	0.26	2.6	2.6
	XHL18-9-20	3794	94.5	10740	894	57447	554	3099	5599	15753	41.1	90.3	22.5	109	125	0.67	403	223	2478	690	2680	684	6541	955	15043	388	14654	0.03	0.008	0.68	15.6	0.36	1.6	5.3
	XHL18-9-21	28534	269	86315	3154	59208	1276	2854	18431	69309	62.7	461	84.3	519	1012	2.14	4395	2382	24585	6493	23601	5734	51371	7646	128349	2142	126207	0.02	0.003	1.23	13.3	0.27	2.5	0.7
	XHL18-9-22	6030	93.3	20675	1058	44863	383	2252	3306	25209	14	137	17.7	105	155	0.36	570	326	3687	1116	4377	1077	9512	1489	22583	429	22154	0.02	0.003	1.72	18.5	0.13	2.8	2.2
	XHL18-9-23	33138	412	107334	4118	41803	1064	5651	22925	90146	1167	2761	344	1469	1448	2.63	5466	2882	29249	7529	26749	5991	50997	7252	143307	7191	136116	0.05	0.003	1.01	14.3	0.25	3.9	0.4
	XHL18-9-24	4975	74.2	19499	848	34630	443	1695	13046	48623	28.7	256	33.7	195	292	1.52	819	371	3709	1070	4252	1038	8938	1463	22467	806	21660	0.04	0.009	1.65	18.2	0.27	1.9	1.8
	XHL18-9-25	12966	116	42668	1458	49980	610	3780	8074	42746	45.1	313	53.4	298	463	1.17	1660	921	10323	2835	10888	2715	24382	3543	58439	1173	57266	0.02	0.004	1.28	15.1	0.19	2.4	1.2
	XHL18-9-26	22113	269	78000	2750	40567	1666	1676	21508	73840	54.8	549	104	632	1075	3.09	3905	2071	21497	5680	20644	4845	42684	6022	109766	2417	107349	0.02	0.004	1.26	13.7	0.29	1.7	0.5
	XHL18-9-27	14509	611	40816	2052	45454	672	1891	11325	50675	132	597	83.4	405	496	1.07	1902	1000	10430	2858	10918	2698	24406	3573	59499	1715	57784	0.03	0.003	1.29	14.3	0.22	3.1	1.1
	XHL18-9-28	27292	381	101842	5039	42777	905	5281	28824	71673	944	2008	229	957	1190	2.73	4533	2351	24132	6645	24496	5876	52081	6990	132432	5330	127102	0.04	0.003	0.99	15.3	0.4	5.6	0.4
	XHL18-9-29	20317	267	67156	2494	51756	1013	3215	10544	51422	49.3	423	72.6	429	804	2.14	3393	1753	18307	4971	18084	4178	35249	4830	92545	1781	90765	0.02	0.003	1.33	13.5	0.21	2.5	0.8
	XHL18-9-30	30997	562	117885	4171	36042	1215	9305	63944	74226	134	936	164	960	1681	3.28	6953	3563	35895	9388	31494	7096	60183	8079	166530	3879	162651	0.02	0.003	1.25	12.6	0.86	3.4	0.3
	XHL18-9-31	14913	93.7	45555	1052	48832	719	1580	10831	39167	27.9	216	33.3	213	446	0.64	2094	1132	11696	3131	11025	2556	22154	3235	57960	937	57023	0.02	0.002	1.42	14.6	0.28	1.5	1.1
